# Supplementary material
Source: publisher site journal article supplement (https://www.spandidos-publications.com/4415/downloadSupplementary)
Supplement: Supplementary file 1 [file downloadSupplementary]

Table SI. Comparison in *KRAS* mutation types between tumor and healthy tissues.

| Case   | Tumor | Healthy tissues (VAF%)                                                             |
|--------|-------|------------------------------------------------------------------------------------|
| IP     | G12V  | G12C, 0.10; G12V, 0.04; G12R, 0.00; G12A, 0.00; G12S, 0.11; G12D, 0.56; G13D, 0.25 |
| Non-IP | G12C  | G12C, 0.41; G12V, 0.00; G12R, 0.00; G12A, 0.00; G12S, 0.75; G12D, 0.42; G13D, 0.18 |

IP, interstitial pneumonia; VAF, variant allele frequency.
